# Supplementary material
Source: PubMed Central journal article supplement (PMC5388135)
Supplement: NIHMS803989-supplement-1.pdf [file NIHMS803989-supplement-1.pdf]

**Table Legends:**

°Percentage of dominant TCRV $\beta$ + circulating neoplastic cells detected by fluorescence-activated cell sorting (FACS); † months between disease onset and time of observation; § In this case the TCR-V $\beta$  panel was unable to identify the neoplastic clone in >95% CD4+ T cells, in the presence of a high percentage (>97%) of CD60+ CD49d- CD26- cells. This feature could be considered as an indirect proof of clonality (Scala E, et al. J Invest Dermatol 2002; 119: 193-6 and references therein). For ST1A, ST1C and ST1D cells were not assayed for CD26.

Abbreviations: W white; AA African American; NA not available; n.d. not determined; ECP extracorporeal photopheresis (numbers indicate the cycles); IFN interferon; Mono-chemo mono-chemotherapy; DD died of disease; DUD died of unrelated disease; AD alive with disease; PUVA psoralen and ultraviolet A radiation therapy; CR complete remission after bone marrow transplantation.
