# Supplementary material
Source: PubMed Central journal article supplement (PMC5388135)
Supplement: NIHMS803989-supplement-3.pdf [file NIHMS803989-supplement-3.pdf]

**Supplementary Table 1A (ST1A): Clinical features of CTCL (MF and SS) patients used in Figure 1B and Figure 4E (denoted with \*). Stage 1B and IIB are MF samples and Stage III/IV are SS samples.**

| Sample ID | Sex | Age | Race | Stage | %CD4+ | Treatment Status         |
|-----------|-----|-----|------|-------|-------|--------------------------|
| PT#1      | F   | 40  | W    | IB    | NA    | Untreated                |
| PT#2      | M   | 64  | W    | IB    | NA    | Untreated                |
| PT#3      | M   | 61  | W    | IB    | NA    | Untreated                |
| PT#4      | M   | 28  | W    | IIB   | NA    | Untreated                |
| PT#5      | M   | 54  | W    | IIB   | NA    | Untreated                |
| *PT#6     | M   | 60  | W    | IIB   | NA    | Untreated                |
| *PT#7     | F   | 87  | AA   | III   | 12%   | Untreated                |
| *PT#8     | M   | 61  | W    | IV    | NA    | Bexarotene, IFN and PUVA |
| *PT#9     | M   | 62  | W    | IV    | NA    | Untreated                |

**Supplementary Table 1B (ST1B): Clinical features of SS patients whose CD4+ T cells were used in Figure 1C**

| Sample ID | Sex Age | TCRV $\beta$ Family | Percent of CD3 <sup>+</sup> CD4 <sup>+</sup> | Percent of TCRV $\beta$ <sup>+</sup> within CD3 <sup>+</sup> CD4 <sup>+</sup> <sup>□</sup> | Percent of clonal CD3 <sup>+</sup> cells | CD4 <sup>+</sup> /CD8 <sup>+</sup> ratio | Time of Disease (mo) <sup>†</sup> | Therapy before blood withdrawal | Status |
|-----------|---------|---------------------|----------------------------------------------|--------------------------------------------------------------------------------------------|------------------------------------------|------------------------------------------|-----------------------------------|---------------------------------|--------|
| P11       | M/48    | 17                  | 96%                                          | 80%                                                                                        | 77.14%                                   | 38.1                                     | 45.2                              | 30 ECP + IFN                    | CR     |
| P15       | F/58    | 7.2                 | 96%                                          | 95%                                                                                        | 90.99%                                   | 22.7                                     | 0.2                               | None                            | CR     |
| P22       | M/73    | null <sup>§</sup>   | 88%                                          | 96%                                                                                        | 84.00%                                   | 48.0                                     | 16.9                              | 5 ECP + IFN                     | DD     |
| P30       | F/47    | 13.1                | 96%                                          | 88%                                                                                        | 84.89%                                   | 27.6                                     | 37.3                              | None                            | AD     |
| P32       | F/82    | 5.1                 | 77%                                          | 90%                                                                                        | 54.69%                                   | 3.4                                      | 7.7                               | 1 ECP + IFN                     | DD     |
| P39       | M/62    | null <sup>§</sup>   | 98%                                          | 95%                                                                                        | 92.94%                                   | 52.7                                     | 0.6                               | 1 ECP + IFN                     | DD     |
| P45       | M/79    | null <sup>§</sup>   | 95%                                          | 92%                                                                                        | 84.25%                                   | 17.4                                     | 19.5                              | 1 ECP + Steroids syst           | DD     |
| P62       | M/80    | 6.7                 | 94%                                          | 90%                                                                                        | n.d.                                     | 47.1                                     | 6.73                              | IFN+Steroids top                | DUD    |
| P65       | M/77    | 5.3                 | 73%                                          | 85%                                                                                        | n.d                                      | 14.9                                     | 0.73                              | Steroids syst+<br>Bexarotene    | AD     |

**Supplementary Table 1C (ST1C): Clinical features of SS patients whose CD4+ T cells were used in Figure 5B and Supplementary Figure 1D-F (denoted with #)**

| Sample ID | Sex | Age | Race | Stage  | %CD4+ | CD4/CD8 ratio | Therapy    | status        |
|-----------|-----|-----|------|--------|-------|---------------|------------|---------------|
| 03-563    | F   | 66  | W    | III-IV | 91%   | 21            | Ontak      | Relapse       |
| 03-670    | F   | 81  | W    | III-IV | 87%   | 32            | Bexarotene | Relapse       |
| # 04-011  | F   | 63  | W    | III-IV | 93%   | 52            | Steroids   | Relapse       |
| 04-669    | F   | 48  | W    | III-IV | 91%   | 44            | Untreated  | New diagnosis |
| 06-0144   | F   | 83  | W    | III-IV | 94%   | 67            | Bexarotene | Relapse       |
| # 07-0214 | M   | 66  | W    | III-IV | 90%   | 34            | Vorinostat | Relapse       |
| # 09-1233 | M   | 74  | W    | III-IV | 95%   | 89            | Interferon | Relapse       |
| 09-1282   | M   | 79  | W    | III-IV | 91%   | 78            | Ontak      | Relapse       |
| 10-0210   | M   | 80  | W    | III-IV | 89%   | 55            | Bexarotene | Relapse       |
| 12-0558   | F   | 68  | W    | III-IV | 91%   | 86            | Bexarotene | Relapse       |

**Supplementary Table 1D (ST1D): Clinical features of SS patients whose CD4+ T cells were used in Figure 4D and 5A**

| Sample ID | Sex | Age | Race | Stage  | %CD4+ | CD4/CD8 ratio | Therapy    | status  |
|-----------|-----|-----|------|--------|-------|---------------|------------|---------|
| PT01      | M   | 65  | AA   | III-IV | 98%   | 196           | Bexarotene | Relapse |
