# Supplementary material
Source: PubMed Central journal article supplement (PMC5388135)
Supplement: NIHMS803989-supplement-4.pdf [file NIHMS803989-supplement-4.pdf]

# Supplementary Figure 1

(A)

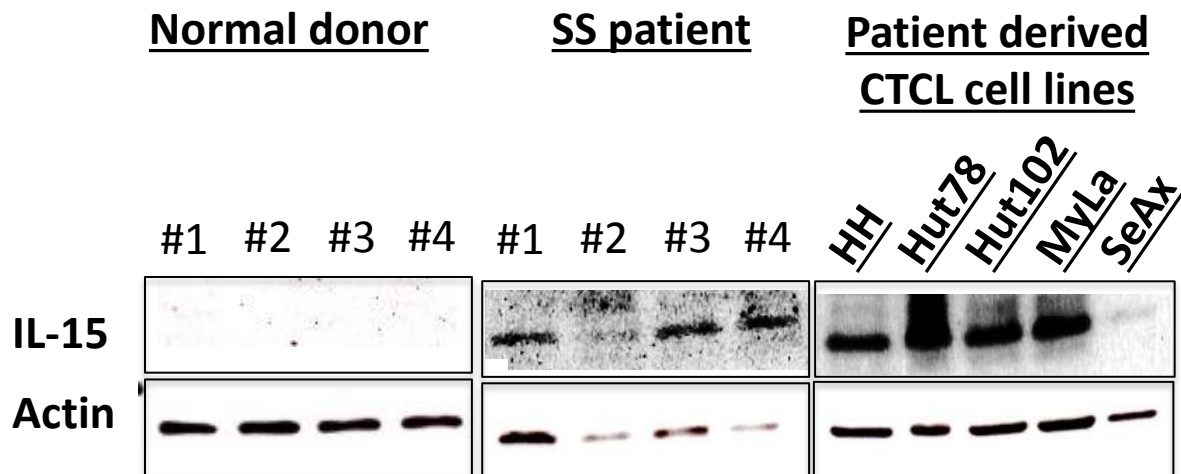

(B)

|                          |                        |  |  |  |  |
|--------------------------|------------------------|--|--|--|--|
|                          | <b>Overall Region</b>  |  |  |  |  |
| <b>From ATG</b>          | -83438 to -83194       |  |  |  |  |
| <b>From TSS</b>          | -575 to -331           |  |  |  |  |
| <b>GRCh37/hg19 chr 4</b> | 142557180 to 142557424 |  |  |  |  |

|                          |           |           |           |           |           |
|--------------------------|-----------|-----------|-----------|-----------|-----------|
| <b>From ATG</b>          | -83438    | -83374    | -83312    | -83297    | -83283    |
| <b>From TSS</b>          | -575      | -511      | -449      | -434      | -420      |
| <b>GRCh37/hg19 chr 4</b> | 142557180 | 142557244 | 142557306 | 142557321 | 142557335 |
| <b>Sample ID</b>         | CpG #1    | CpG #2    | CpG #3    | CpG #4    | CpG #5    |

|                          |           |           |           |           |           |
|--------------------------|-----------|-----------|-----------|-----------|-----------|
| <b>From ATG</b>          | -83266    | -83229    | -83227    | -83214    | -83194    |
| <b>From TSS</b>          | -403      | -366      | -364      | -351      | -331      |
| <b>GRCh37/hg19 chr 4</b> | 142557352 | 142557389 | 142557391 | 142557404 | 142557424 |
| <b>Sample ID</b>         | CpG #6    | CpG #7    | CpG #8    | CpG #9    | CpG #10   |

# Supplementary Figure 1

(C)

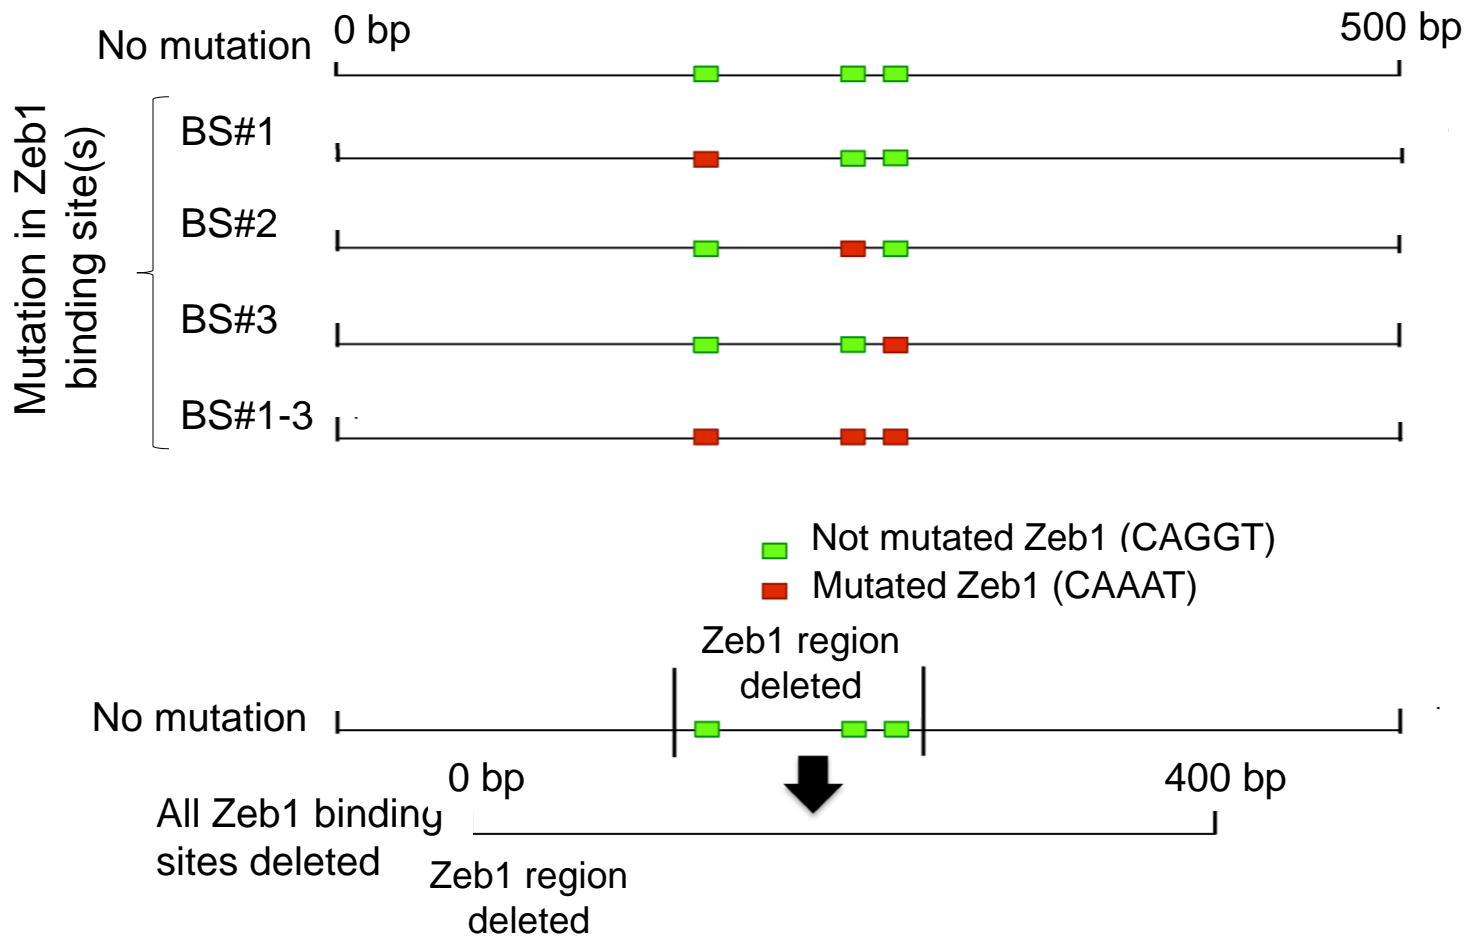

(D)

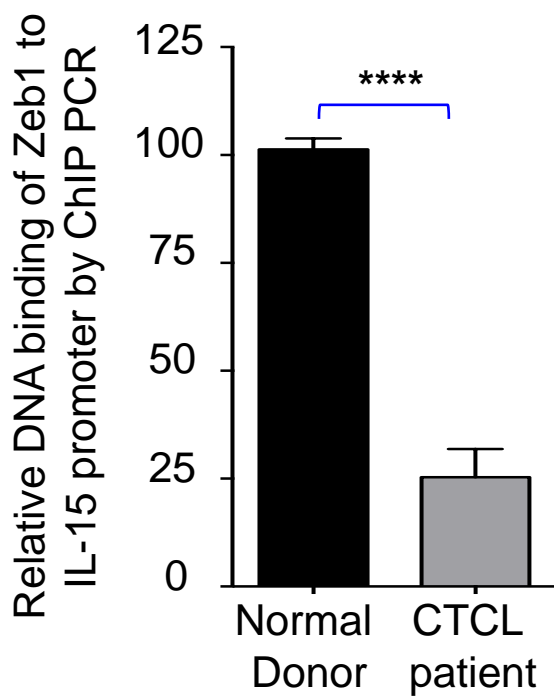

# Supplementary Figure 1

(E)

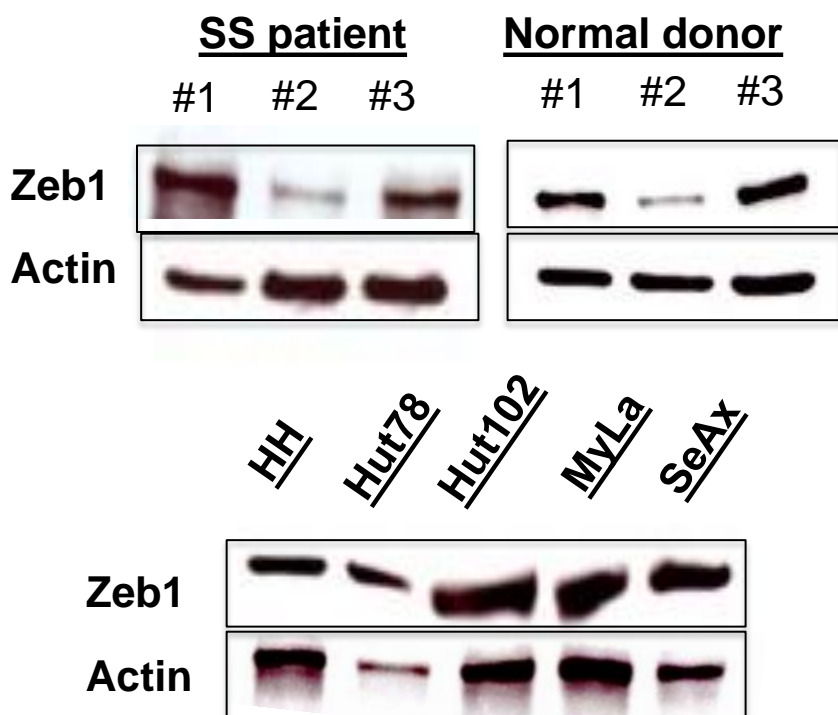

(F)

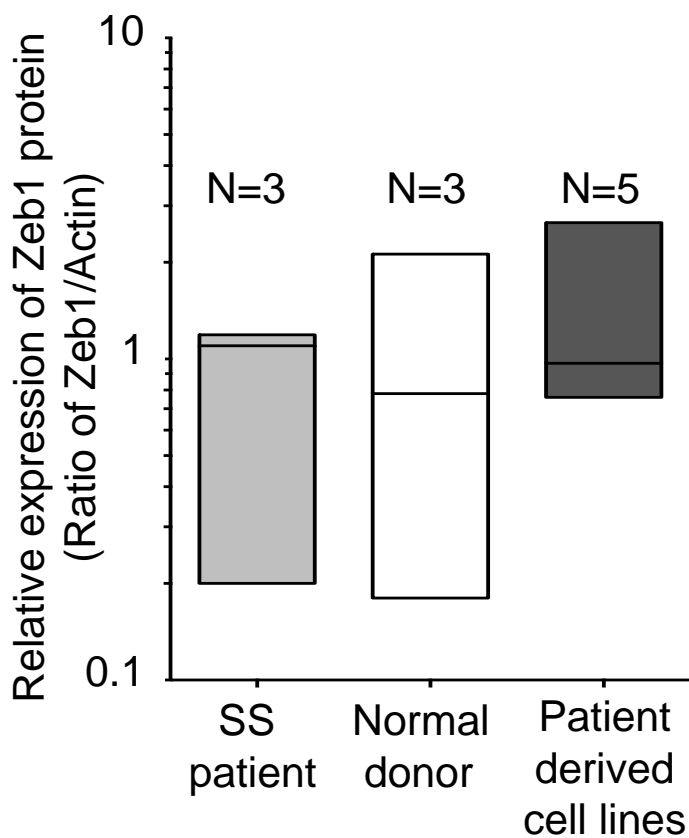

(G)

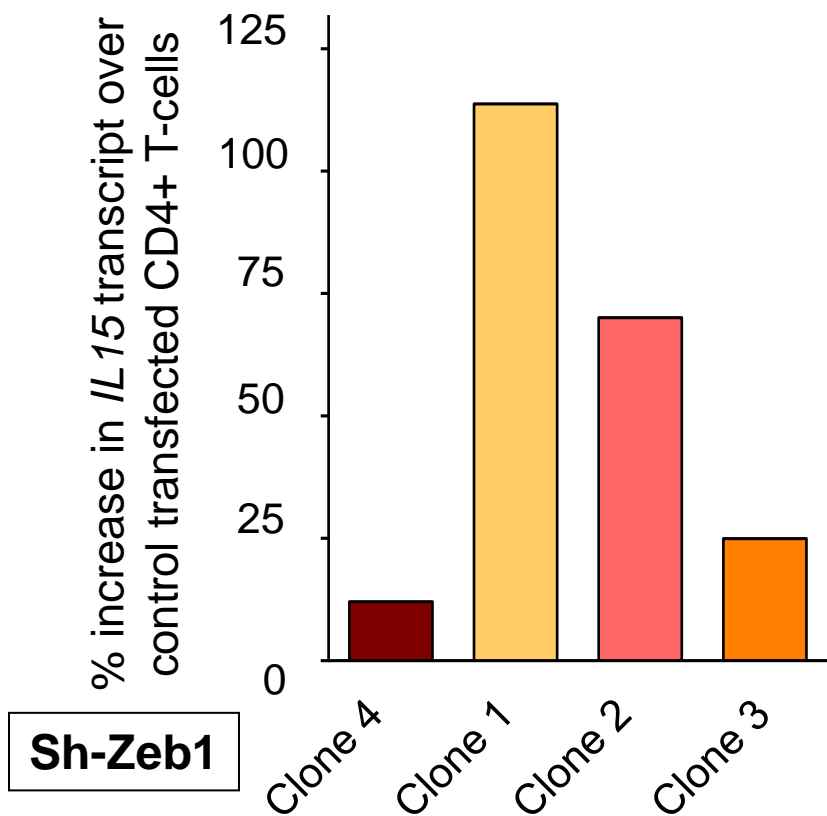

## Supplementary Figure 2

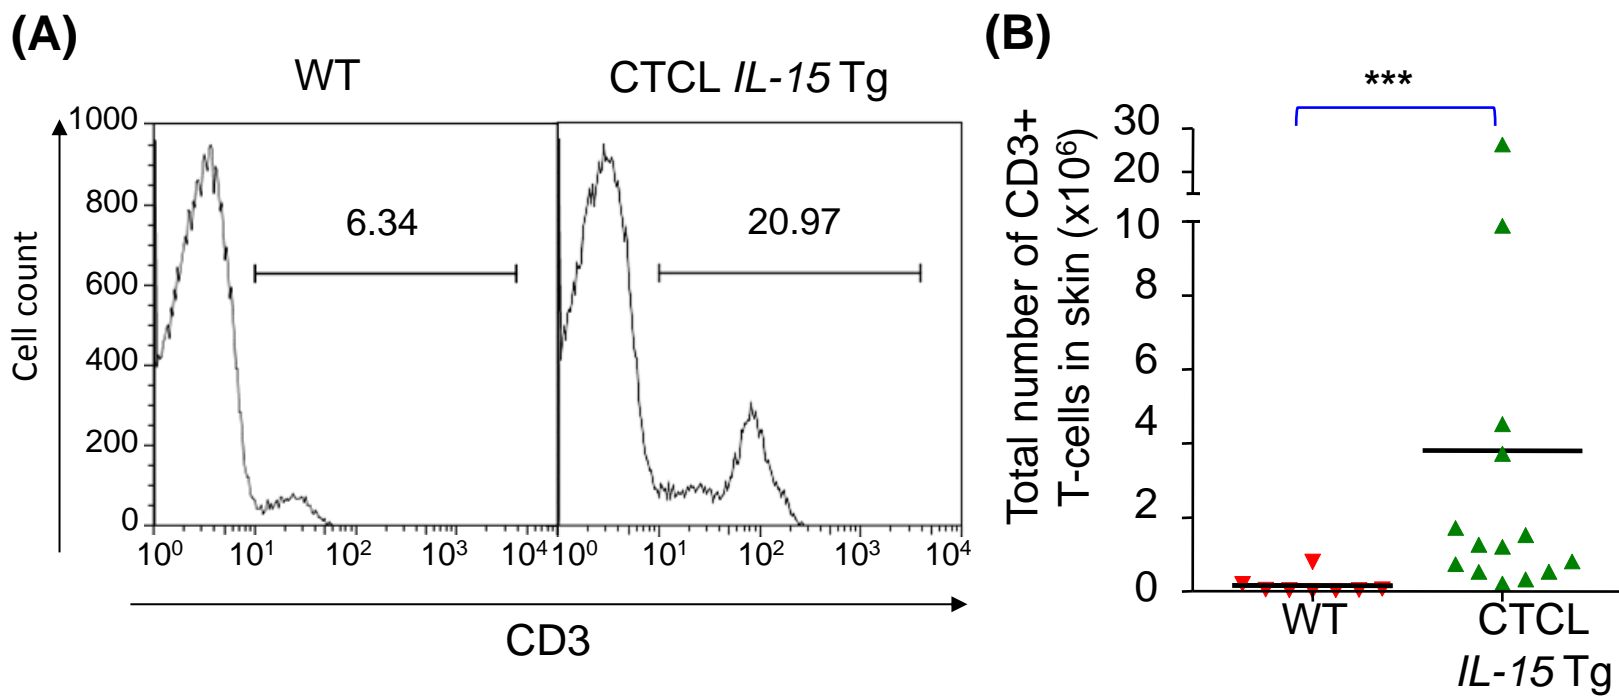

**(C)**

WT CTCL *IL-15* Tg

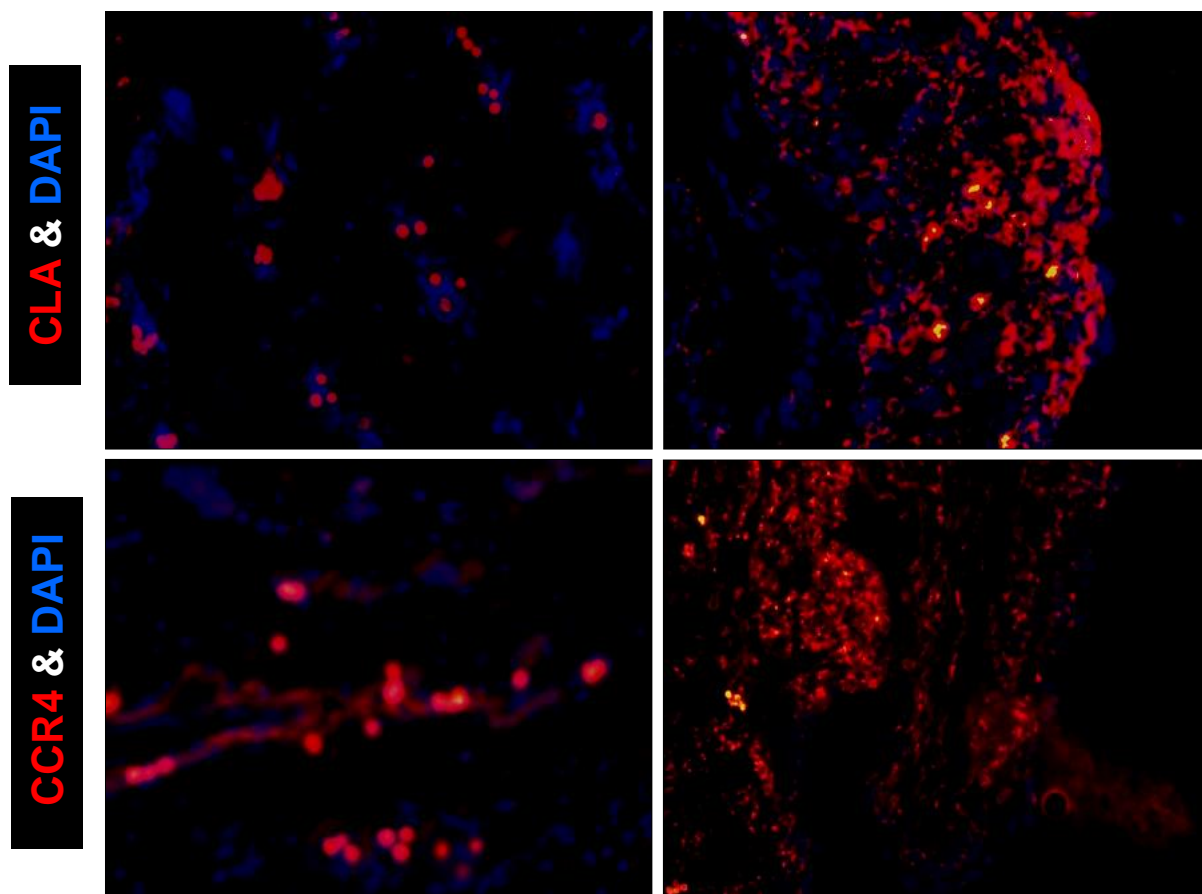

# Supplementary Figure 2

(D)

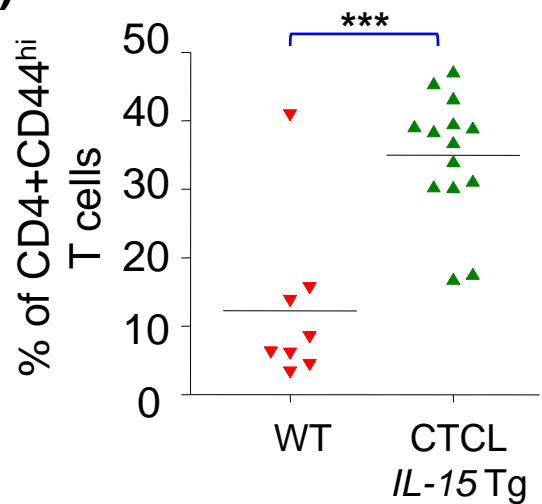

(E)

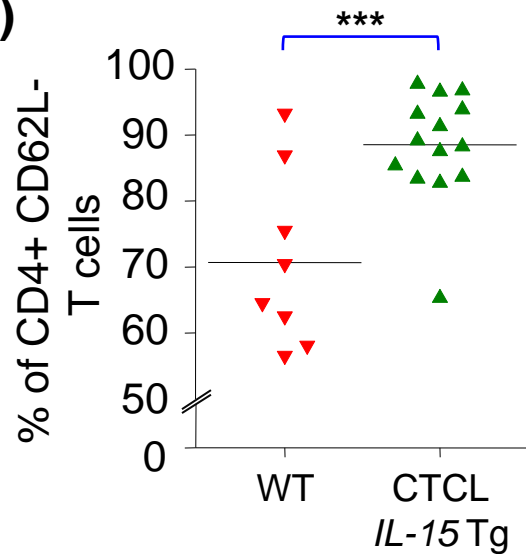

(F)

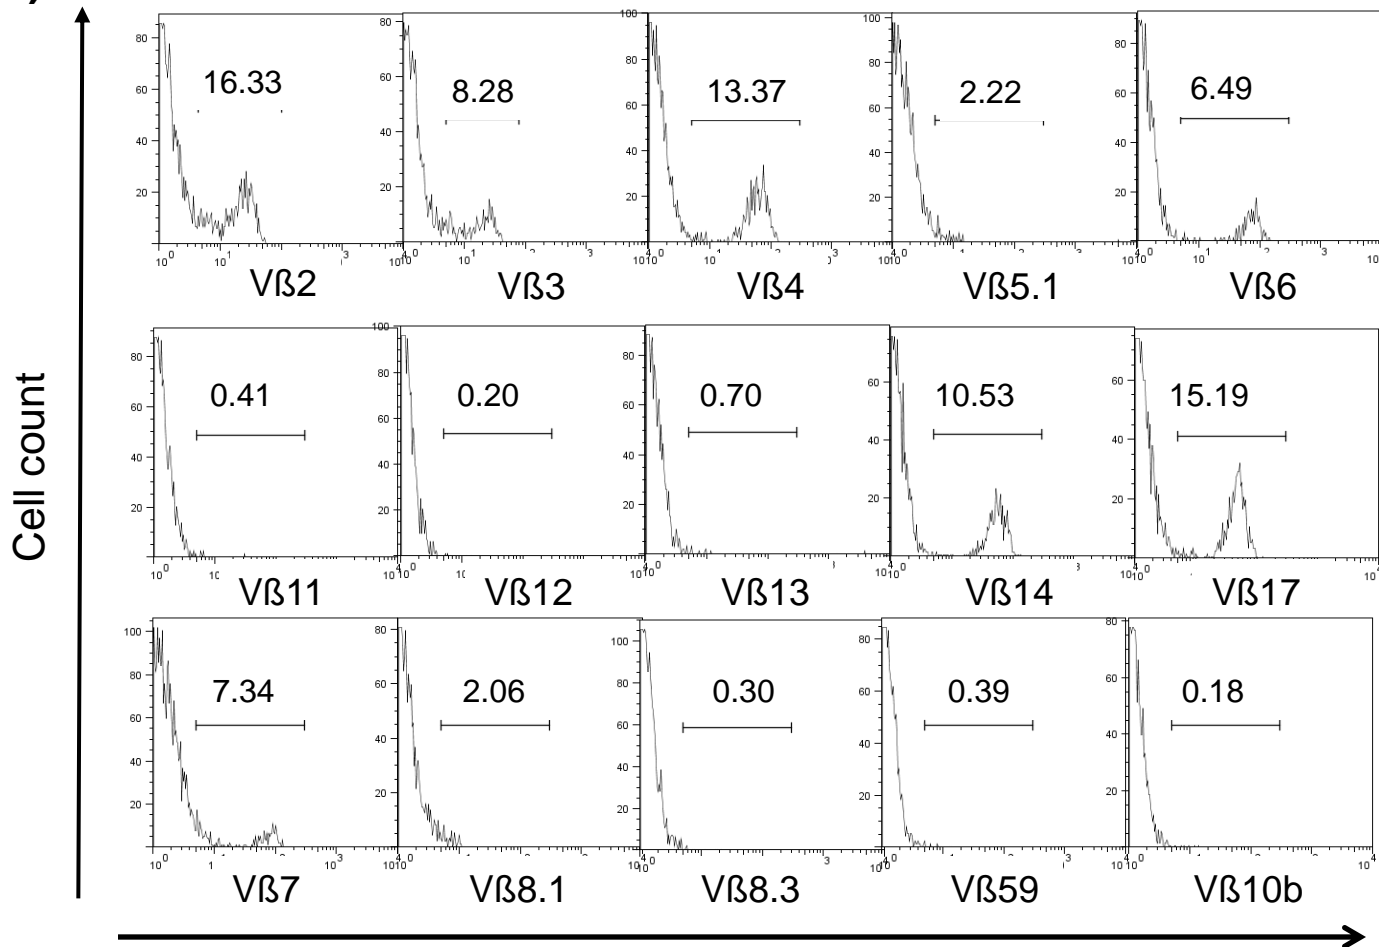

## Supplementary Figure 2

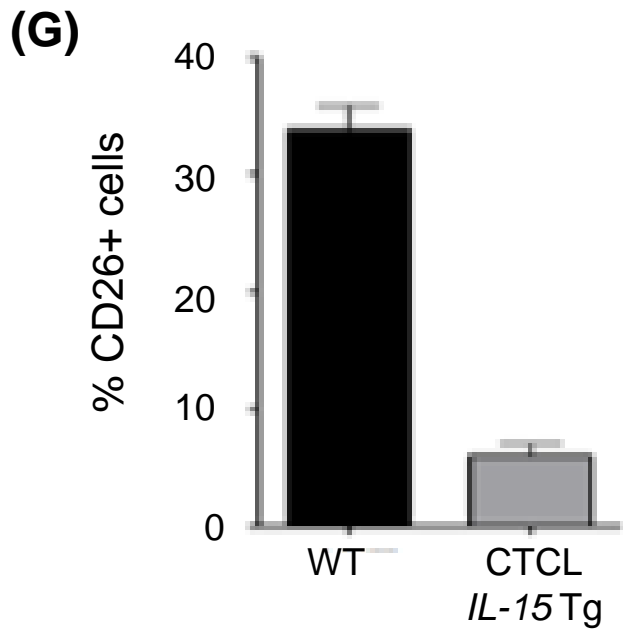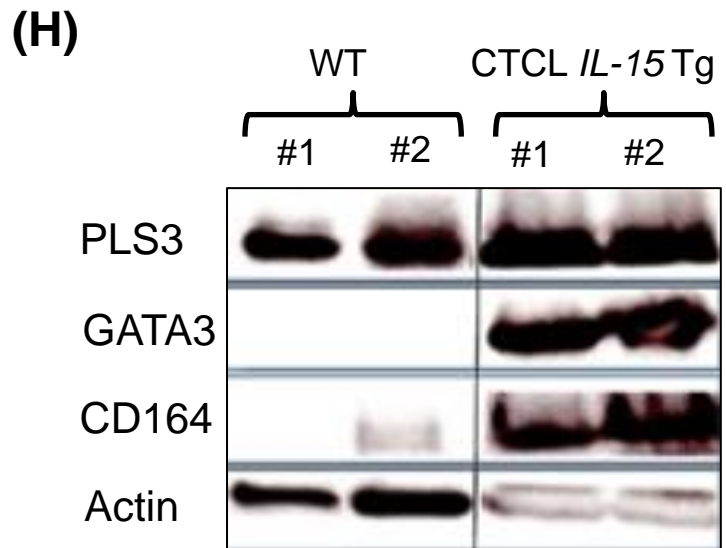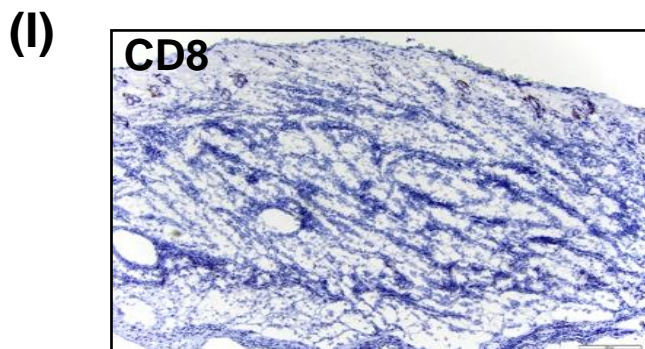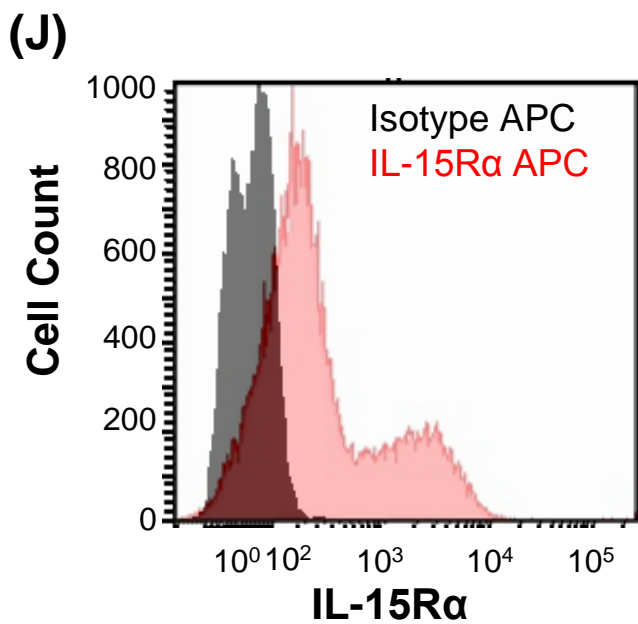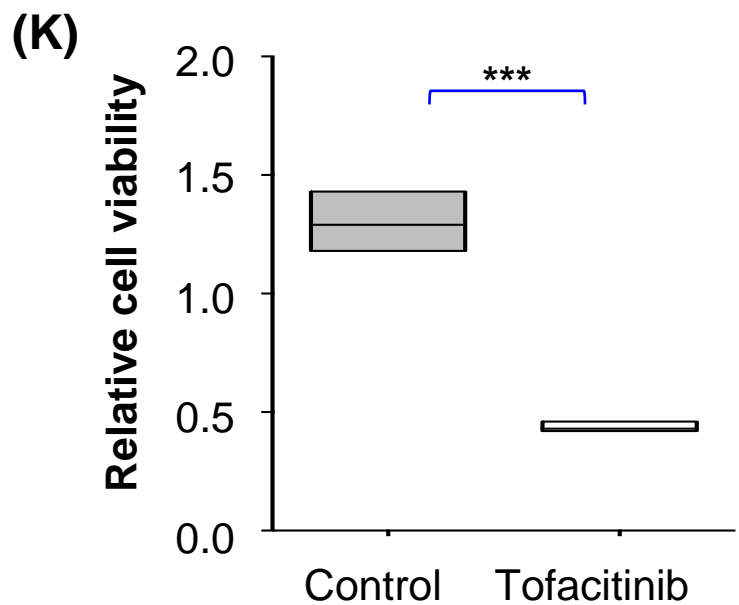

# Supplementary Figure 3

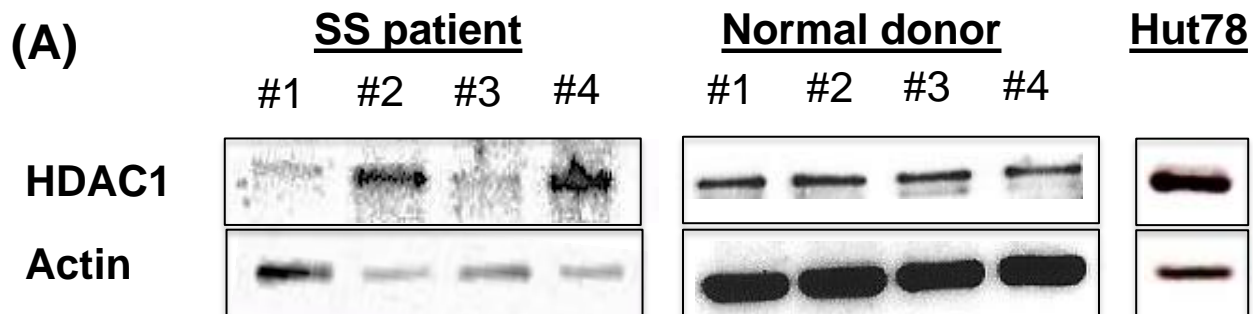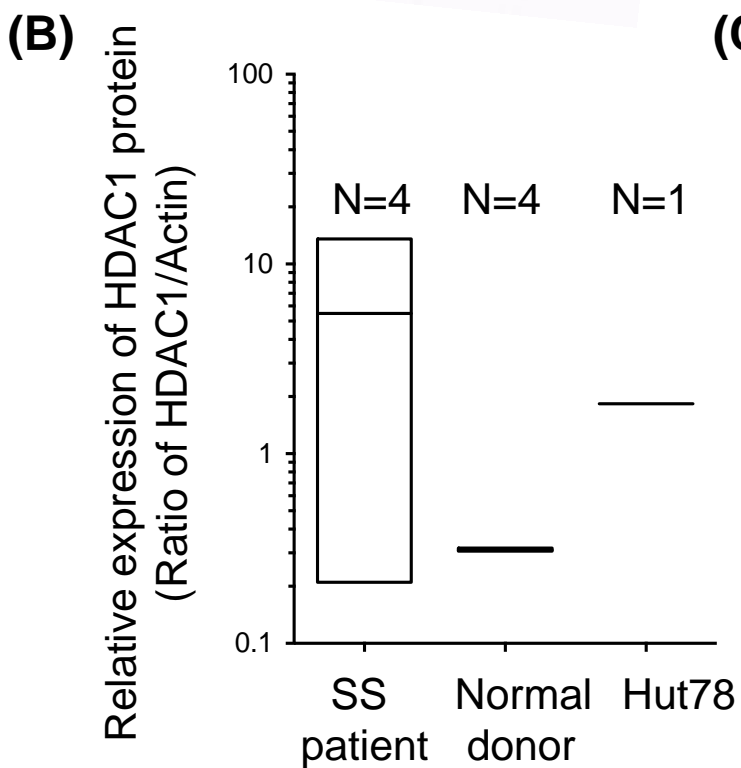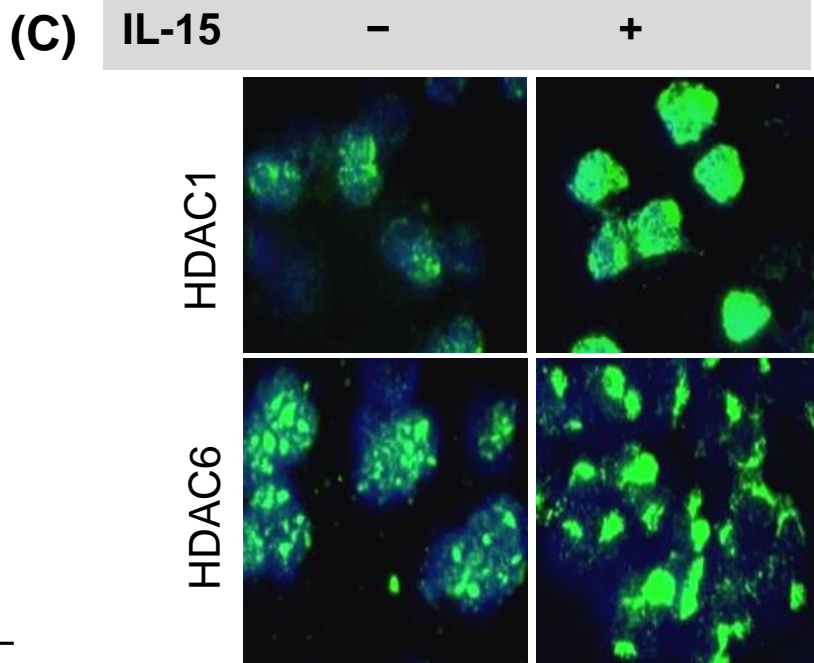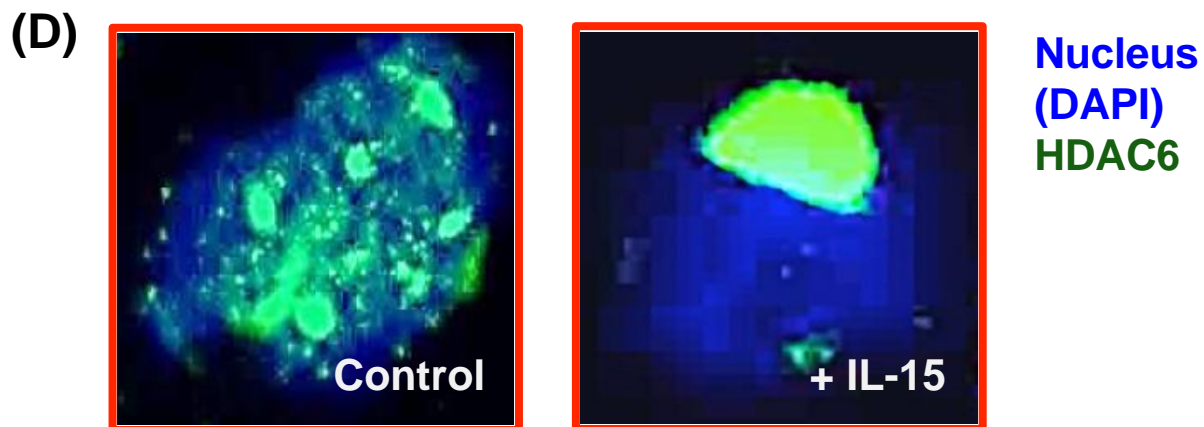

### Supplementary Figure 3

(E)

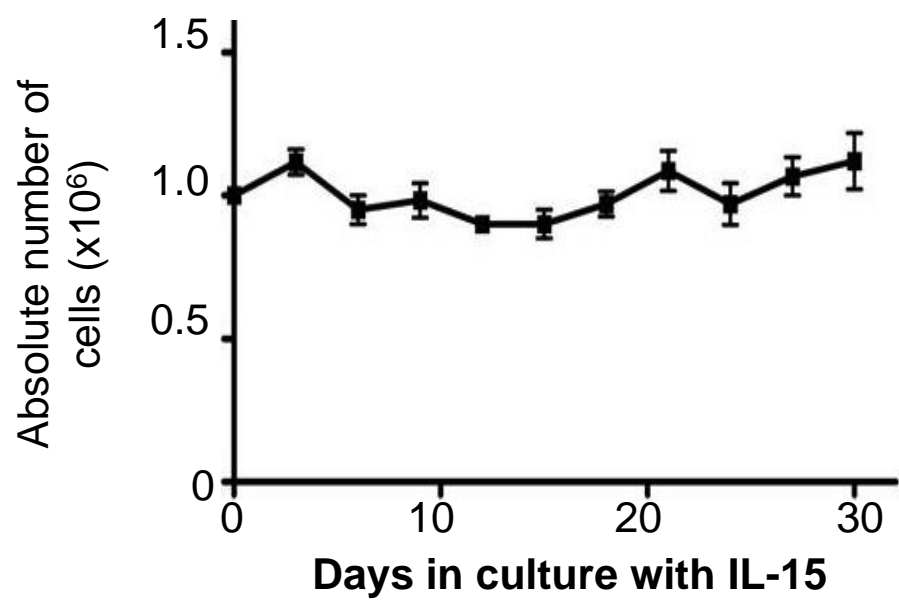



# Supplementary Figure 4

(A)

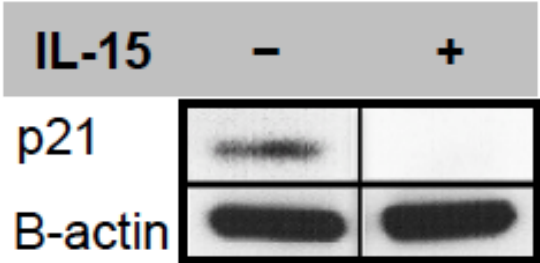

(B)

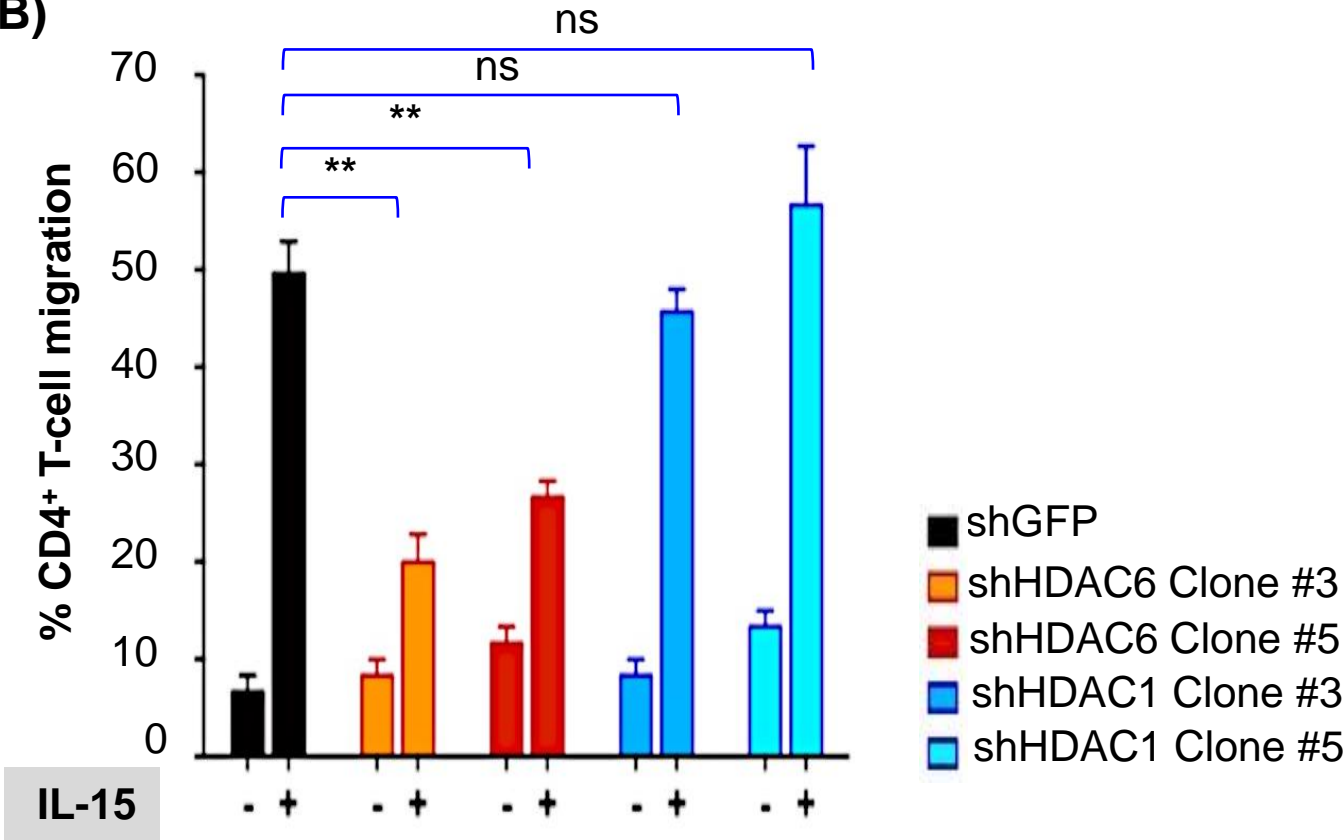

# Supplementary Figure 5

(A)

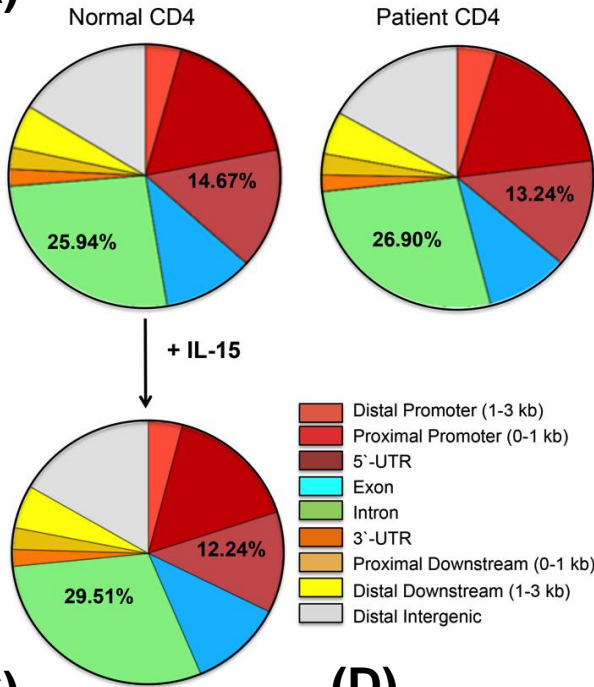

(B)

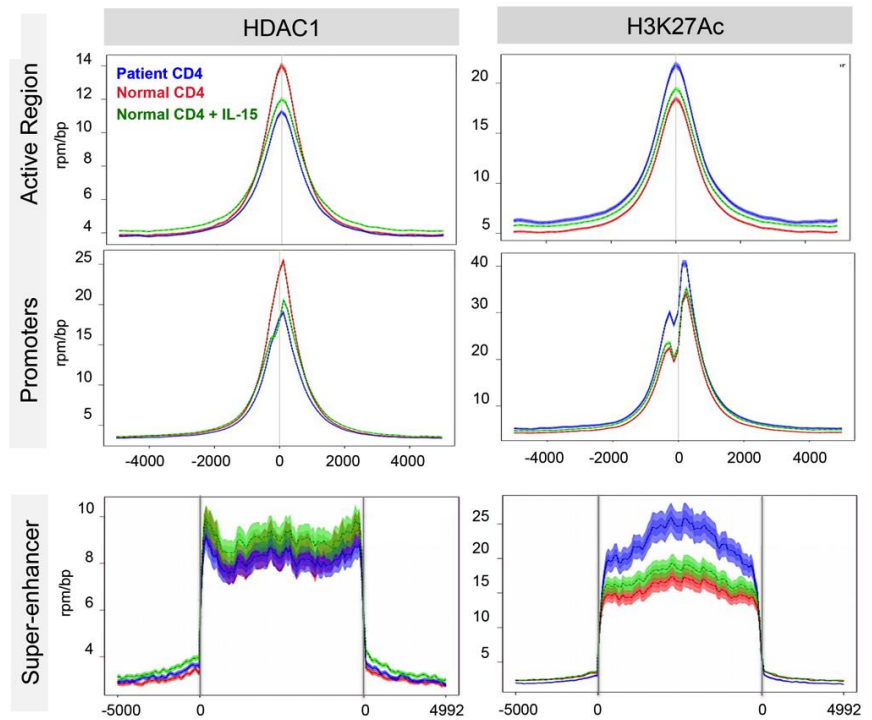

(C)

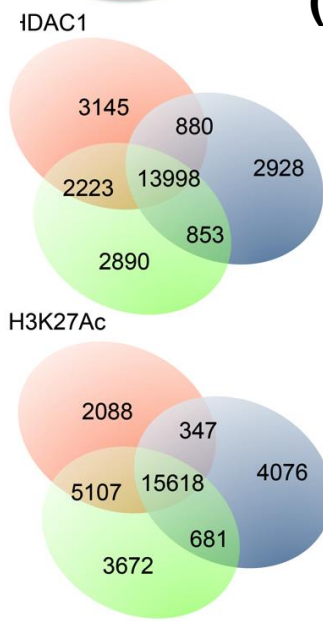

(D)

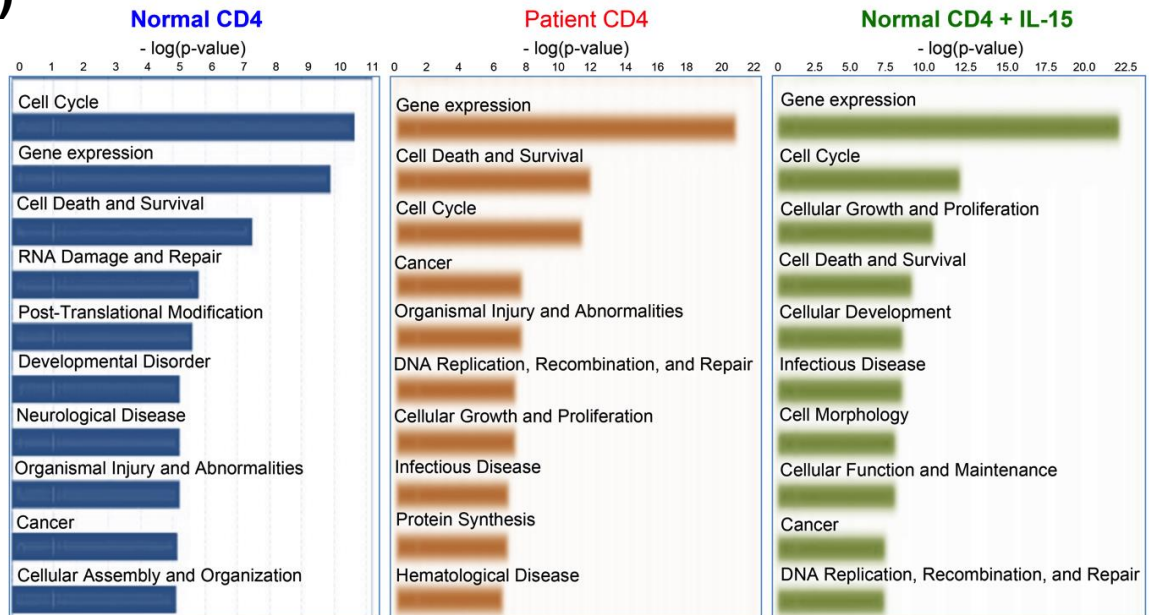

(E)

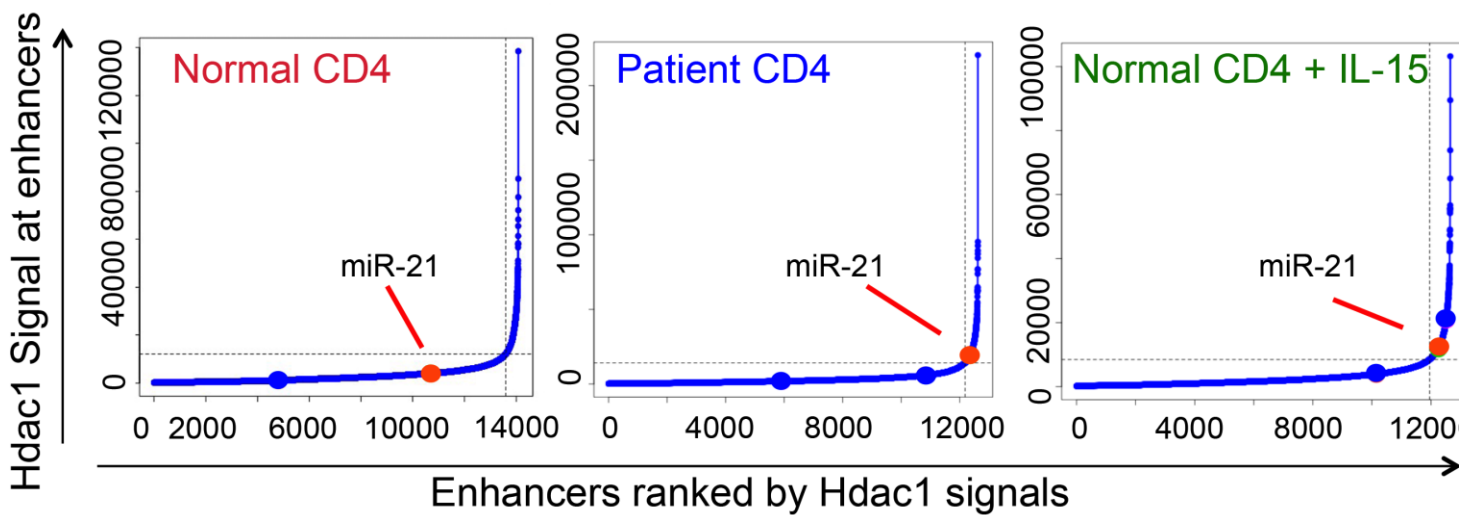

# Supplementary Figure 5

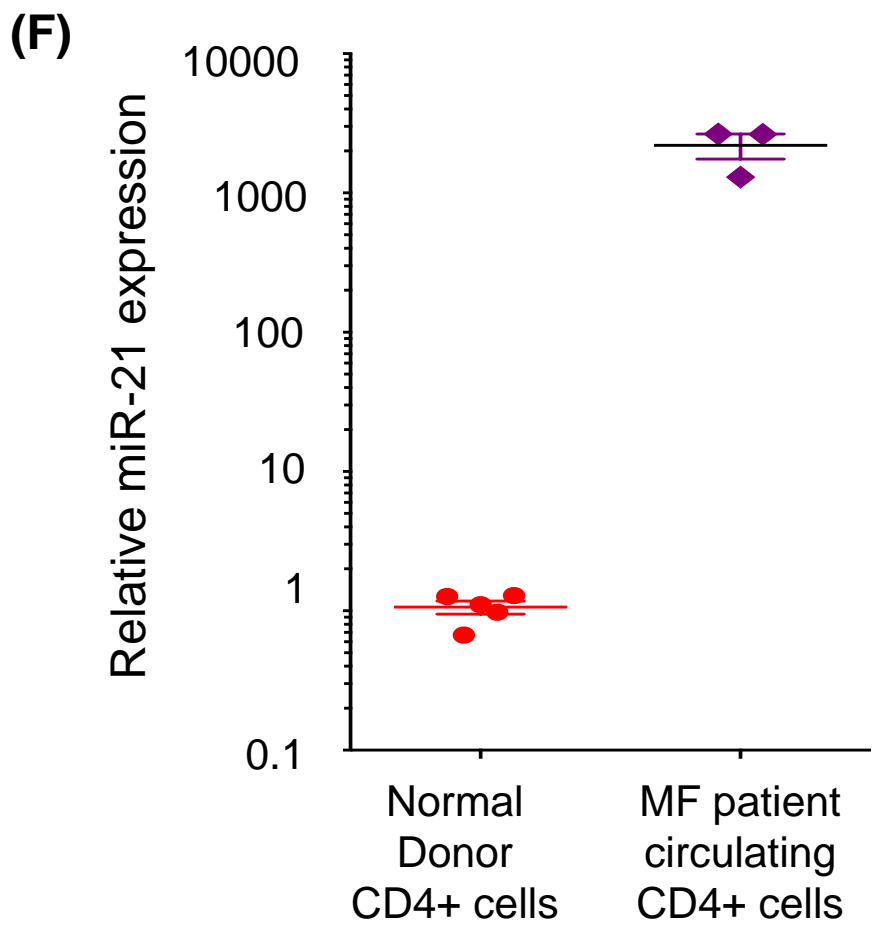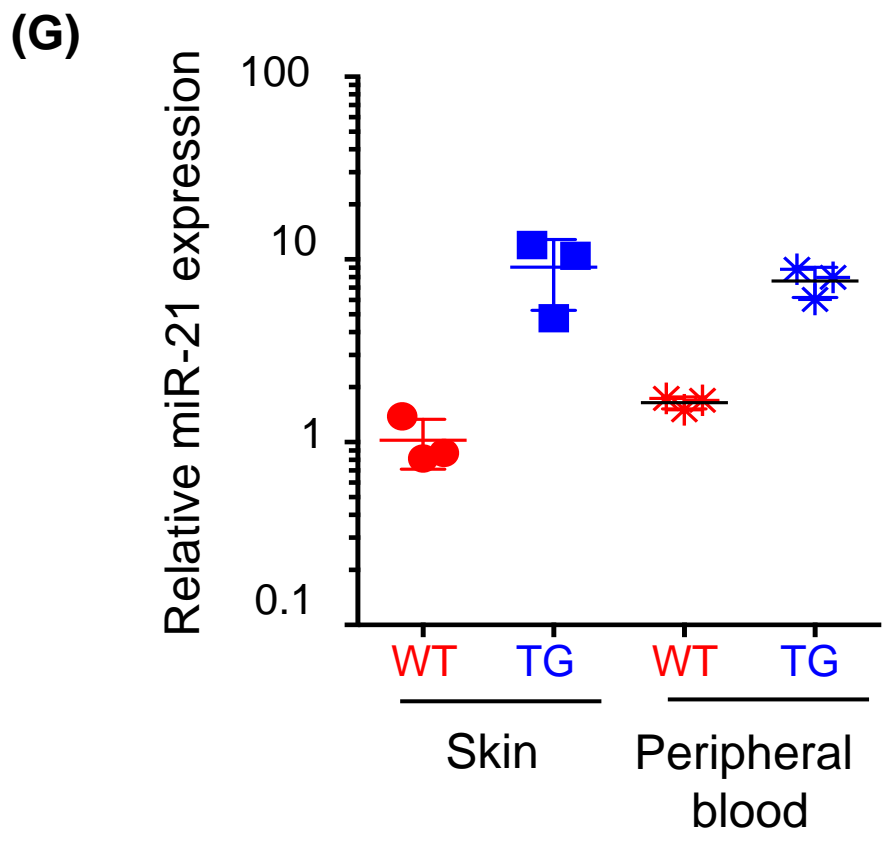



# Supplementary Figure 6

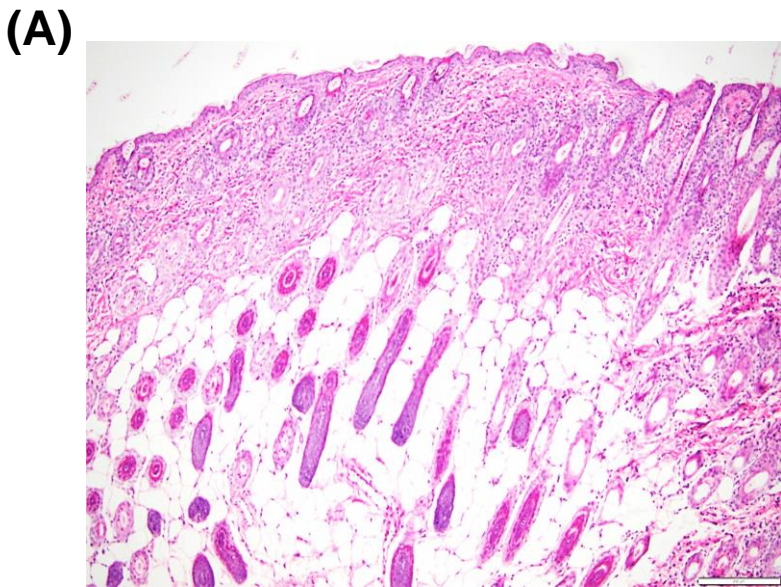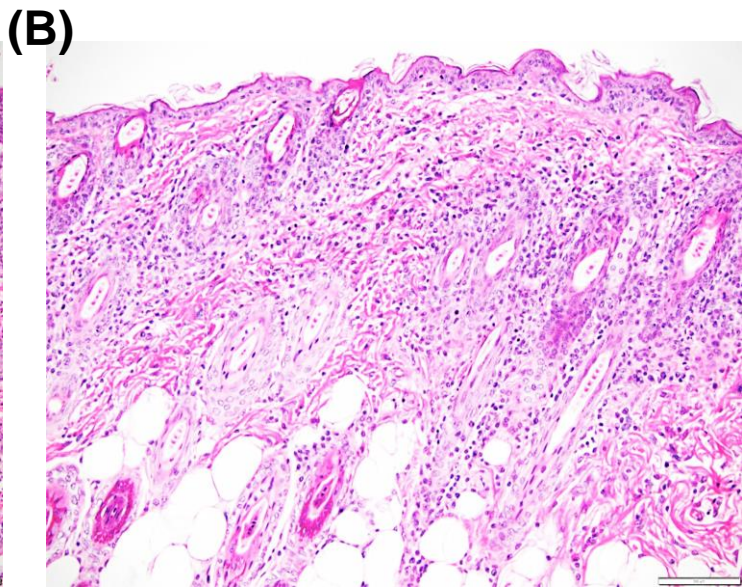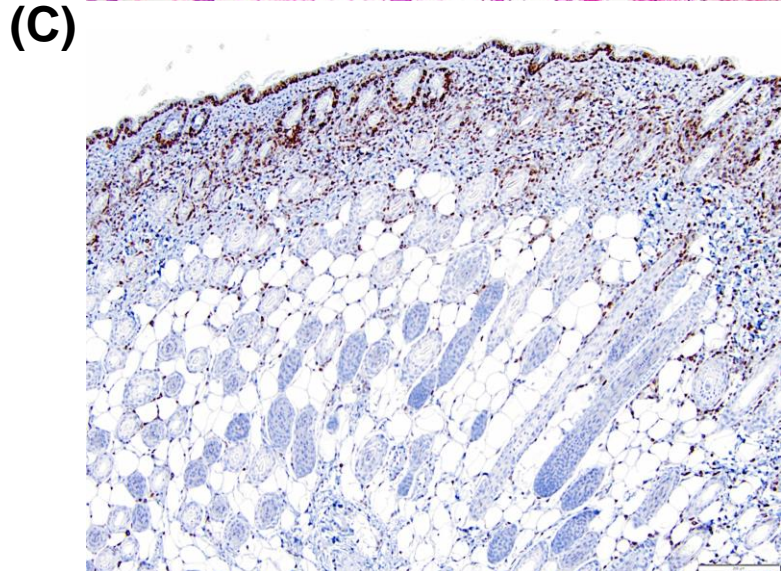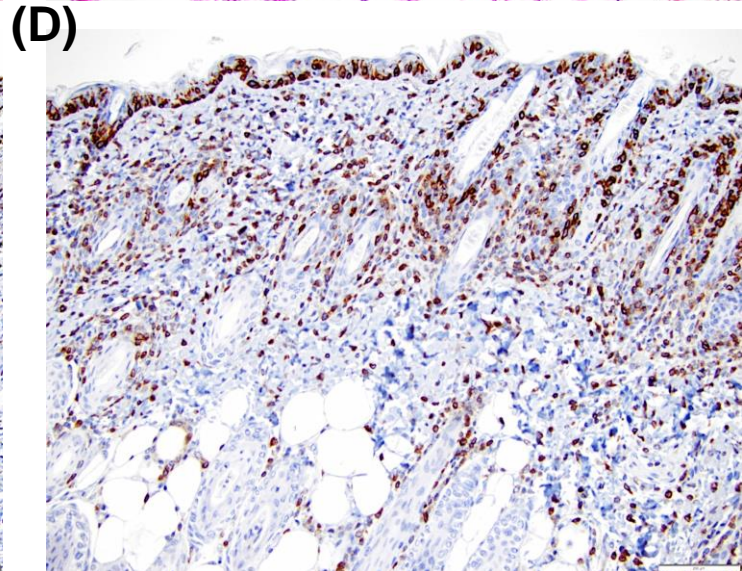

## Supplementary Figure 7

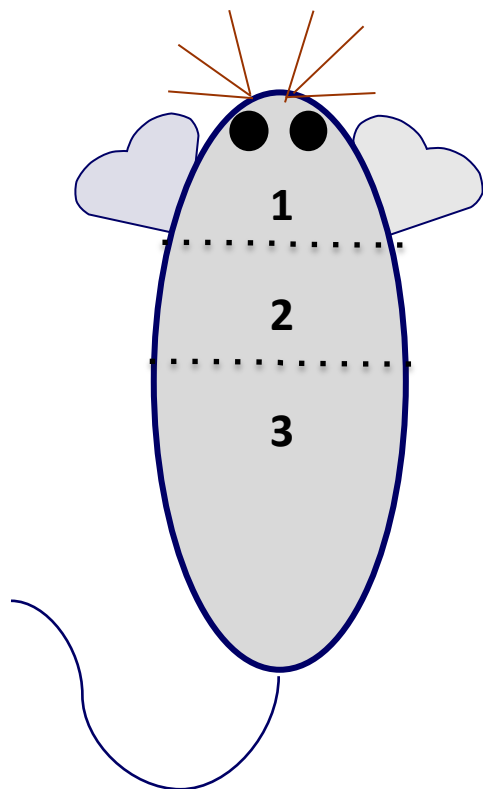

| <b>A</b> | <b>Erythema</b>   | <b>Score</b> |
|----------|-------------------|--------------|
|          | None              | 0            |
|          | Region 1          | 1            |
|          | Region 1 and 2    | 2            |
|          | Region 1, 2 and 3 | 3            |

| <b>B</b> | <b>Scaling/Plaque</b> | <b>Score</b> |
|----------|-----------------------|--------------|
|          | None                  | 0            |
|          | Region 1              | 1            |
|          | Region 1 and 2        | 2            |
|          | Region 1, 2 and 3     | 3            |

| <b>C</b> | <b>Character of Lesion</b> | <b>Score</b> |
|----------|----------------------------|--------------|
|          | None                       | 0            |
|          | Region 1                   | 1            |
|          | Region 1 and 2             | 2            |
|          | Region 1, 2 and 3          | 3            |

| <b>D</b> | <b>Regions Affected</b> | <b>Score</b> |
|----------|-------------------------|--------------|
|          | None                    | 0            |
|          | Region 1                | 1            |
|          | Region 1 and 2          | 2            |
|          | Region 1, 2 and 3       | 3            |

| <b>E</b> | <b>Calculated Severity Score</b> |
|----------|----------------------------------|
|          | $[(A+B+C+D) \div 12] \times 100$ |
